# Supplementary material for: Vitamin D and schizophrenia: 20 years on
Source: PubMed Central journal article supplement (PMC8505257; doi:10.1038/s41380-021-01025-0), 2021-01-26
Supplement: 41380_2021_1025_MOESM2_ESM.pdf [file 41380_2021_1025_MOESM2_ESM.pdf]

Supplementary Table 1 Serum vitamin D levels in patients with chronic schizophrenia.

| Studies                       | Subjects   |              | Mean age (Year) | 25OHD (nM)    |             | Definition of deficiency and insufficiency (nM) and prevalence (%) |       |       | In/Out Patient | Country          | Outcomes (Association between vitamin D levels and symptoms, biochemistry and brain structure in SZ patients)                                                                               |
|-------------------------------|------------|--------------|-----------------|---------------|-------------|--------------------------------------------------------------------|-------|-------|----------------|------------------|---------------------------------------------------------------------------------------------------------------------------------------------------------------------------------------------|
|                               | nSZ(nMale) | nCtrl(nMale) |                 | SZ            | Ctrl        | nM                                                                 | SZ    | Ctrl  |                |                  |                                                                                                                                                                                             |
|                               |            |              | Mean ± SD       |               |             |                                                                    |       |       |                |                  |                                                                                                                                                                                             |
| Yazici et al. 2019a [1]       | 189(108)   | 109(59)      | 41.4            | 43.8 ± 24.1   | 53.2 ± 27.3 | < 50                                                               | 66.5% | 51.5% | In             | Turkey           | N/A                                                                                                                                                                                         |
| Yazici et al. 2019b [2]       | 30(30)     | 28(28)       | 40.5            | 28.4 ± 11.5   | 34.2 ± 12.3 | < 75                                                               | 21.9% | 35.0% | Out            | Turkey           | No correlation between serum vitamin D levels and PANSS scores                                                                                                                              |
| Van der Leeuw et al. 2019 [3] | 347(268)   | 282(118)     | 30.3            | 47.0 ± 26.1** | 60.1 ± 26.5 | < 75                                                               | 82.8% | 62.5% | Both           | Netherland       | An inverse association between serum vitamin D levels and positive and negative symptom scores                                                                                              |
| Malik et al. 2019 [4]         | 40(26)     | 40(18)       | 40.0            | 37.6          | 37.6        | < 25                                                               | 25.0% | 30.0% | Out            | Pakistan         | N/A                                                                                                                                                                                         |
| Peitl et al. 2019 [5]         | 97(45)     |              | 40.2            | 53.6 ± 29.0   |             | < 50                                                               | 67.5% | 50.0% | In             | Croatia          | A positive association between serum vitamin D levels and neuregulin 1                                                                                                                      |
| Arranz et al. 2019 [6]        | 199(103)   |              | 47              | 42.0          |             | < 50                                                               | 73.7% |       | Out            | Spain            | An inverse association between serum vitamin D and the risk of presenting metabolic syndrome                                                                                                |
| Zoghbi et al. 2019 [7]        | 196(118)   |              | 37.3            |               |             | < 50                                                               | 46.5% |       | In             | Lebanon          | Severe vitamin D deficiency was associated with an increase in MRSS score                                                                                                                   |
| Fond et al. 2019 [8]          | 251(180)   |              | 35.4            |               |             | < 25                                                               | 27.5% |       | Out            | France           | An inverse association between serum vitamin D levels and negative symptoms, high suicide risk, anti-depressant consumption.                                                                |
| Ikonen et al. 2019 [9]        | 40(22)     | 4659(2315)   | 31              | 65.5          | 74.3        | < 30                                                               | 2.5%  | 3.2%  | Out            | Northern Finland | N/A                                                                                                                                                                                         |
| Coentre et al. 2019 [10]      | 33(23)     |              | 41.2            | 40.5 ± 28.2   |             | < 50                                                               | 27.5% | 25.2% | Out            | Portugal         | An inverse association between serum vitamin D levels and general psychopathology                                                                                                           |
| Gurholt et al. 2018 [11]      | 90 (43)    | 91(54)       | 30.6            | 48.8 ± 17.6   | 53.5 ± 20.0 |                                                                    |       |       | Both           | Norway           | A positive association between serum vitamin D levels and intracranial volume                                                                                                               |
| Patel et al. 2018 [12]        | 18         |              | 40.6            | 29.5 ± 10.3   |             |                                                                    |       |       | In             | UK               | N/A                                                                                                                                                                                         |
| Bruins et al. 2018 [13]       | 1840(1174) |              | 44.7            | 48.5 ± 27.4   |             | < 50                                                               | 67.2% |       | Out            | Netherland       | Logarithmic serum vitamin D levels was association with the logarithmic PANSS Negative Subscale                                                                                             |
| Kulaksizoglu et al. 2017 [14] | 64(36)     | 54(31)       | 38.3            | 25.2 ± 6.6    | 27.2 ± 8.6  |                                                                    |       |       | Out            | Turkey           | A negative correlation between serum vitamin D levels and PANSS-negative symptom score, and triglyceride and insulin levels. A positive correlation between vitamin D levels and HDL levels |

|                              |                      |      |                   |                  |               |                |                |      |               |                                                                                                                      |
|------------------------------|----------------------|------|-------------------|------------------|---------------|----------------|----------------|------|---------------|----------------------------------------------------------------------------------------------------------------------|
| Akinlade et al. 2017 [15]    | 60<br>30             | 35.1 | 49.4 ± 13.0***    | 70.2 ± 14.1      | < 50<br>< 75  | 58.3%<br>40.0% | 6.7%<br>56.7%  | In   | Nigeria       | No correlation between serum vitamin D levels and PANSS scores                                                       |
| Dogan Bulut et al. 2016 [16] | 80(42)<br>74(39)     | 36.6 | 58.7 ± 35.0       | 59.2 ± 24.0      | < 25<br>< 50  | 25.0%<br>13.8% | 8.1%<br>28.4%  | Out  | Turkey        | An inverse association between serum vitamin D levels and the severity of positive and negative symptoms             |
| Endres et al. 2016 [17]      | 60(35)<br>3917(1706) | 33.5 | 37.5 ± 24.5       | 45.0 ± 31.5      | < 50<br>< 75  | 80.0%<br>15.0% | 57.3%<br>20.8% | In   | Germany       | N/A                                                                                                                  |
| Lally et al. 2016 [18]       | 324(193)             | 43.6 | 31.0 ± 18.3       |                  | < 25<br>< 50  | 48.8%<br>37.3% |                | Out  | England       | An inverse association between serum vitamin D levels and cardiovascular disease risk factors and metabolic syndrome |
| Bazzano et al. 2016 [19]     | 61                   | 44   | 54.5 ± 29.9       |                  | < 50<br>< 75  | 51.4%<br>35.1% |                | In   | USA           | N/A                                                                                                                  |
| Bogers et al. 2016 [20]      | 28(24)<br>29(10)     | 44   | 33<br>median      | 73<br>mediam     | <50           | 79%            |                | In   | Netherlands   | N/A                                                                                                                  |
| Shivakumar et al. 2015 [21]  | 35(20)               | 32.1 | 36.3 ± 14.3       |                  | < 50<br>< 75  | 83.0%<br>14.0% |                | Out  | India         | A positive association between serum vitamin D levels and right hippocampal grey matter                              |
| Nerhus et al. 2015 [22]      | 71(46)<br>142(92)    | 28.0 | 43.0 ± 20.3       | 45.0 ± 21.4      |               |                |                | Both | Norway        | No correlation between serum vitamin D levels and PANSS scores                                                       |
| Zhu et al. 2015 [23]         | 93(41)<br>93(52)     | 29.5 | 26.4 ± 13.3***    | 43.7 ± 15.2      |               |                |                | Out  | China         | An inverse association between serum vitamin D levels and CRP                                                        |
| Yuksele et al. 2014 [24]     | 41(27)<br>40(19)     | 38.9 | 37.6<br>(median)  | 37.6<br>(median) | < 25<br>< 50  | 22.0%<br>68.3% | 30.0%<br>55.0% | Out  | Turkey        | A negative correlation between serum vitamin D levels and CGI and PANSS scores                                       |
| Clelland et al. 2014 [25]    | 64(31)<br>90(46)     | 38.5 | 79.1 ± 56.6       | 92.7 ± 56.8      | < 75          | 68.8%          | 46.7%          | In   | USA           | N/A                                                                                                                  |
| Cieslak et al. 2014 [26]     | 22(13)               | 44.3 | 43.3 ± 22.3       |                  | < 75          | 90.9%          |                | Both | USA           | A strong inverse association between low serum vitamin D and negative symptoms in males                              |
| Itzhaky et al. 2012 [27]     | 50(34)<br>50(13)     | 40.2 | 37.5 ± 18.3*      | 50.5 ± 19.5      | <37.5<br>< 75 | 57.1%<br>40.8% | 24.5%<br>63.3% | In   | Israel        | No correlation between serum vitamin D levels and PANSS scores                                                       |
| McCue et al. 2012 [28]       | 107(70)              | 43.3 | 52.8 ± 26.0       |                  | < 50          | 52.3%          |                | In   | North America | No relationship between serum vitamin D levels and major psychiatric diagnosis categories                            |
| Abdullah et al. 2012 [29]    | 185                  | 40.0 | 52.5              |                  | < 80          | 88.6%          |                | In   | USA           | No association between serum vitamin D levels and BPRS                                                               |
| Menkes et al. 2012 [30]      | 49                   |      | 34.5 ± 15.4       |                  | < 25<br>< 50  | 26.5%<br>59.2% |                | In   | New Zealand   | N/A                                                                                                                  |
| Murie et al. 2012 [31]       | 25                   | 47.0 |                   |                  | < 25<br>< 50  | 56%<br>36%     |                | In   | UK            | N/A                                                                                                                  |
| Doknic et al. 2011 [32]      | 26(12)<br>35(11)     | 31.3 | 23.6 ± 2.8<br>*** | 71.9 ± 8.3       |               |                |                | Out  | Serbia        | N/A                                                                                                                  |

|                              |                      |                |                                |                                |              |                    |                |  |     |         |                                                                                                                                                      |
|------------------------------|----------------------|----------------|--------------------------------|--------------------------------|--------------|--------------------|----------------|--|-----|---------|------------------------------------------------------------------------------------------------------------------------------------------------------|
| Partti et al. 2010 [33]      | 48(20)<br>6100(2808) | 53.5           | 38.9                           | 45.1                           |              |                    |                |  | Out | Finland | N/A                                                                                                                                                  |
| Humble et al. 2010 [34]      | 20(8)                | 47.4           | 35<br>(median)                 |                                |              |                    |                |  | Out | USA     | N/A                                                                                                                                                  |
| Norelli et al. 2010 [35]     | 20(15)<br>20(11)     | 46.1           | 50.0 ± 22.3                    | 56.8 ± 32.5                    | < 50<br>< 75 | 50.0%<br>30.0%     | 45.0%<br>35.0% |  | In  | USA     | N/A                                                                                                                                                  |
| Rey-Sanchez et al. 2009 [36] | 73(48)<br>73(48)     | F59.8<br>M61.9 | F 51.1 ± 65.1<br>M 37.8 ± 29.9 | F 82.8 ± 48.6<br>M 45.3 ± 38.6 | < 37.5       | F 74.1%<br>M 69.6% |                |  | In  | Spain   | An inverse association between serum vitamin D levels and hyperparathyroidism, hyperprolactinaemia and accelerated bone turnover in female patients. |
| Bergemann et al. 2008 [37]   | 72(0)<br>71(0)       | 33.8           | 40.8 ± 19.8<br>***             | 61.5 ± 28.8                    |              |                    |                |  | In  | Germany | N/A                                                                                                                                                  |
| Schneider et al. 2000 [38]   | 34(19)<br>31(19)     | 38.9           | 87.8 ± 65.3*                   | 114.8 ± 49.5                   |              |                    |                |  | Out | Germany | N/A                                                                                                                                                  |
| Higuchi et al. 1987 [39]     | 12(5)<br>5(5)        | 35.9           | 31.5 ± 5.5**                   | 55.8 ± 3.5                     |              |                    |                |  | In  | Japan   | N/A                                                                                                                                                  |

Where indicated serum 25OHD levels were significantly lower in schizophrenia patients compared to the healthy controls (\* $p < 0.05$ , \*\* $p < 0.01$ , \*\*\* $p < 0.001$ ). Abbreviations in the Table: SZ, schizophrenia; Ctrl, control; CRP, C-reactive protein; PANSS, the Positive and Negative Syndrome Scale; CGI, Clinical Global Impression; MRSS, Morningside Rehabilitation Status Scale; HDL, high density lipoprotein; BPRS, The Brief Psychiatric Rating Scale. N/A indicates that the study did not examine the association between serum 25OHD levels and psychotic symptoms/scores, or other biochemical and brain structural outcome.

Supplementary Table 2. Vitamin D deficiency and First Episode Psychosis (FEP)

| Studies                       | Subjects<br>nFEP(nMale)<br>nCtrl(nMale) | Mean<br>Age<br>(Year) | 25OHD (nM)       |                  | Definition of vitamin D<br>deficiency or insufficiency<br>(nM) and prevalence (%) |                |                | In/Out<br>Patient | Country   | Outcomes<br>(Association between vitamin D levels and symptoms,<br>biochemistry and brain structure in FEP patients)               |
|-------------------------------|-----------------------------------------|-----------------------|------------------|------------------|-----------------------------------------------------------------------------------|----------------|----------------|-------------------|-----------|------------------------------------------------------------------------------------------------------------------------------------|
|                               |                                         |                       | Mean ± SD        |                  | (nM)                                                                              | FEP (%)        | Ctrl (%)       |                   |           |                                                                                                                                    |
|                               |                                         |                       | FEP              | Ctrl             |                                                                                   |                |                |                   |           |                                                                                                                                    |
| Yazici et al.<br>(b) 2019 [2] | 30(30)<br>28(28)                        | 40.6                  | 40.5 ± 44.8      | 34.2 ± 12.3      |                                                                                   |                |                | In                | Turkey    | No correlation between serum vitamin D levels and PANSS scores                                                                     |
| Malik et al.<br>2019 [4]      | 40(26)<br>40(18)                        | 38.7                  | 17.9***          | 37.5             | < 25<br>< 50                                                                      | 63.5%<br>30.0% | 30.0%<br>50.0% | Out               | Pakistan  | N/A                                                                                                                                |
| Coentre et al.<br>2019 [10]   | 33(23)                                  | 31.2                  | 45.4 ± 18.7      |                  |                                                                                   |                |                | In                | Portugal  | An inverse correlation between vitamin D levels and the severities of depressive and negative symptoms and general psychopathology |
| Lally et al.<br>2019 [40]     | 168(108)                                | 29.3                  | 34.5 ± 23.3      |                  | < 50                                                                              | 80.0%          |                | Out               | UK        | A negative association between baseline serum vitamin D levels and negative psychotic symptoms at one year after FEP.              |
| Salavert et al.<br>2017[41]   | 22(16)<br>22(6)                         | 31.1                  | 32.9 ± 14.9 **   | 56.6 ± 19.1      | < 50<br><75                                                                       | 86.4%<br>13.6% | 36.4%<br>40.9% | In                | Spain     | N/A                                                                                                                                |
| Yee et al.<br>2016 [42]       | 31(15)<br>31(14)                        | 29.1                  | 61.7 ± 26.7      | 61.3 ± 22.6      |                                                                                   |                |                | In                | Singapore | A negative association between serum vitamin D levels and negative symptoms                                                        |
| Graham et al.<br>2015 [43]    | 20(12)<br>20(12)                        | 23                    | 70.5 ± 31.5      | 74.8 ± 35.8      | < 75                                                                              | 55.0%          |                | Out               | USA       | A reverse correlation between serum vitamin D levels and negative and cognitive deficits.                                          |
| Nerhus et al.<br>2015 [22]    | 71(46)<br>142(92)                       | 27.3                  | 44.8 ± 19.5      | 45.1 ± 21.4      |                                                                                   |                |                | Both              | Norway    | N/A                                                                                                                                |
| Yuksel et al.<br>2014 [24]    | 40(19)<br>40(20)                        | 38.1                  | 17.9<br>(median) | 37.6<br>(median) | < 25<br>< 50                                                                      | 65.0%<br>30.0% | 30.0%<br>55.0% | In                | Turkey    | An inverse association between serum vitamin D levels and negative symptoms                                                        |
| Crews et al.<br>2013 [44]     | 69(27)<br>69(27)                        | 31                    | 36.5 ± 23.0***   | 53.8 ± 33.0      | < 25<br>< 50                                                                      | 36.2%<br>39.0% | 15.9%<br>43.0% | In                | UK        | N/A                                                                                                                                |
| Dealberto et al.<br>2013 [45] | 20(11)                                  |                       | 38.0 ± 10        |                  |                                                                                   |                |                | In                | Canada    | N/A                                                                                                                                |
| Norelli et al.<br>2010 [35]   | 20(17)<br>20(11)                        | 39.4                  | 47.8 ± 24.5      | 56.8 ± 32.5      | < 50<br>< 75                                                                      | 65.0%<br>20.0% | 45.0%<br>35.0% | In                | USA       | N/A                                                                                                                                |

Where indicated serum 25OHD levels were significantly lower in FEP compared to the healthy controls (Ctrl) (\*\* $p < 0.01$  \*\*\*,  $p < 0.001$ ). N/A indicates that the study did not examine the association between serum vitamin D levels and psychotic symptoms/scores, or other biochemical and brain structural outcomes.

Supplementary Table 3. Clinical trials of vitamin D supplementation in schizophrenia

| Studies                          | Vitamin D<br>nSupplementation(nMale)<br>nPlacebo (nMale) | Age<br>(Year) | country | Illness<br>Length<br>(Year) | Vitamin D<br>supplementation<br>(dose and duration)                     | Outcomes<br>(Association between vitamin D<br>supplementation and symptoms and<br>biochemistry in SZ patients) |
|----------------------------------|----------------------------------------------------------|---------------|---------|-----------------------------|-------------------------------------------------------------------------|----------------------------------------------------------------------------------------------------------------|
| Ghaderi et al.<br>2019 [46]      | 30(28)<br>30(28)                                         | 44.8          | Iran    | 2                           | 50,000 IU every 2 week for 12<br>weeks plus probiotic                   | Improved the general and total PANSS scores<br>and metabolic profiles                                          |
| Fond et al.<br>2018 [47]         | 12(8)<br>30(25)                                          | 36            | France  | 16.4                        | 12 months                                                               | Improved depressive symptoms and lower rates<br>of current anxiety disorder.                                   |
| Krivoy et al.<br>2017[48]        | 24(18)<br>23(14)                                         | 39.4          | Israel  | 16                          | 14,000IU per week for eight<br>weeks (maintaining clozapine)            | A trend to improve cognition                                                                                   |
| Sheikhmoonesi<br>et al. 2016[49] | 40(40)<br>40(40)                                         | 46.2          | Iran    | 6.3                         | Two intramuscular vitamin D<br>injection at 300 000IU in three<br>month | No improvement                                                                                                 |
| DealBerto et al.<br>2016 [45]    | 8<br>9                                                   |               | Canada  |                             | 1000IU vitamin D                                                        | No improvement                                                                                                 |
| Thakurathi et al.<br>2013 [50]   | 19(12)                                                   | 50.2          | USA     | 4.9                         | 2000IU daily for 8 weeks                                                | Reducing total cholesterol                                                                                     |
| Tiangga et al.<br>2008 [51]      | 17(17)                                                   |               | UK      | >1year                      | Calcium and egocalciferol<br>(400U) for 7 month                         | Increasing 25OHD levels                                                                                        |

#### References

- 1 Yazici AB, Akcay Ciner O, Yazici E, Cilli AS, Dogan B & Erol A. Comparison of vitamin B12, vitamin D and folic acid blood levels in patients with schizophrenia, drug addiction and controls. *J. Clin. Neurosci.* 2019; **65**: 11-16.
- 2 Yazici E, Mutu Pek T, Guzel D, Yazici AB, Akcay Ciner O & Erol A. Klotho, vitamin D and homocysteine levels during acute episode and remission periods in schizophrenia patients. *Nord J Psychiatry* 2019; **73**: 178-184.
- 3 van der Leeuw C, de Witte LD, Stellinga A, van der Ley C, Bruggeman R, Kahn RS *et al.* Vitamin D concentration and psychotic disorder: associations with disease status, clinical variables and urbanicity. *Psychol. Med.* 2019; **50**: 1680-1686.
- 4 Malik BR, Zafar MH & Khan S. Role of Vitamin D as adjuvant therapy of hypovitaminosis D in patients of schizophrenia. *Pakistan Journal of Medical and Health Sciences* 2019; **13**: 303-305.

- 5 Peitl V, Silic A, Orlovic I, Vidrih B, Crnkovic D & Karlovic D. Vitamin D and neurotrophin levels and their impact on the symptoms of schizophrenia. *Neuropsychobiology* 2019; **79**: 179-185.
- 6 Arranz B, Sanchez-Autet M, San L, Safont G, Fuente-Tomas L, Hernandez C *et al.* Are plasma 25-hydroxyvitamin D and retinol levels and one-carbon metabolism related to metabolic syndrome in patients with a severe mental disorder? *Psychiatry Res.* 2019; **273**: 22-29.
- 7 Zoghbi M, Haddad C, Hallit S, Nabout R, Medlej-Hashim M, Hachem D *et al.* Cognition and physical functioning in patients with schizophrenia: any role for vitamin D? *Nutr. Neurosci.* 2019 e-pub ahead of print Feb 17:1-9. doi: 10.1080/1028415X.2019.1580830.: 1-9.
- 8 Fond G, Faugere M, Faget-Agius C, Cermolacce M, Richieri R, Boyer L *et al.* Hypovitaminosis D is associated with negative symptoms, suicide risk, agoraphobia, impaired functional remission, and antidepressant consumption in schizophrenia. *Eur. Arch. Psychiatry Clin. Neurosci.* 2019; **269**: 879-886.
- 9 Ikonen H, Palaniswamy S, Nordstrom T, Jarvelin MR, Herzig KH, Jaaskelainen E *et al.* Vitamin D status and correlates of low vitamin D in schizophrenia, other psychoses and non-psychotic depression - The Northern Finland Birth Cohort 1966 study. *Psychiatry Res.* 2019; **279**: 186-194
- 10 Coentre R & Canelas da Silva I. Symptomatic correlates of vitamin D deficiency in first-episode psychosis. *Psychiatry J* 2019; **2019**: 7839287.
- 11 Gurholt TP, Nerhus M, Osnes K, Berg AO, Andreassen OA, Melle I *et al.* Hippocampus volume reduction in psychosis spectrum could be ameliorated by vitamin D. *Schizophr. Res.* 2018; **199**: 433-435.
- 12 Patel D & Minajagi M. Prevalence of vitamin D deficiency in adult patients admitted to a psychiatric hospital. *BJPsych Bull* 2018; **42**: 123-126.
- 13 Bruins J, Jorg F, van den Heuvel ER, Bartels-Velthuis AA, Corpeleijn E, Muskiet FAJ *et al.* The relation of vitamin D, metabolic risk and negative symptom severity in people with psychotic disorders. *Schizophr. Res.* 2018; **195**: 513-518.
- 14 Kulaksizoglu S & B K. The relationship between metabolic syndrome, BDNF, and vitamin D in patients with schizophrenia. *Clinical Neurochemistry* 2017; **11**: 104-111.

- 15 Akinlade KS, Olaniyan OA, Lasebikan VO & Rahamon SK. Vitamin D levels in different severity groups of schizophrenia. *Front Psychiatry* 2017; **8**: 105.
- 16 Dogan Bulut S, Bulut S, Gorkem Atalan D, Berkol T, Gurcay E, Turker T *et al.* The relationship between symptom severity and low vitamin D levels in patients with schizophrenia. *PLoS One* 2016; **11**: e0165284.
- 17 Endres D, Dersch R, Stich O, Buchwald A, Perlov E, Feige B *et al.* Vitamin D deficiency in adult patients with schizophreniform and Autism spectrum syndromes: A one-year cohort study at a German Tertiary Care Hospital. *Front Psychiatry* 2016; **7**: 168.
- 18 Lally J, Gardner-Sood P, Firdosi M, Iyegbe C, Stubbs B, Greenwood K *et al.* Clinical correlates of vitamin D deficiency in established psychosis. *BMC Psychiatry* 2016; **16**: 76.
- 19 Bazzano AN, Littrell L, Lambert S & Roi C. Factors associated with vitamin D status of low-income, hospitalized psychiatric patients: results of a retrospective study. *Neuropsychiatr. Dis. Treat.* 2016; **12**: 2973-2980.
- 20 Bogers J, Bostoen T & Broekman TG. Low levels of vitamin D poorly responsive to daylight exposure in patients with therapy-resistant schizophrenia. *Nord J Psychiatry* 2016; **70**: 262-266.
- 21 Shivakumar V, Kalmady SV, Amaresha AC, Jose D, Narayanaswamy JC, Agarwal SM *et al.* Serum vitamin D and hippocampal gray matter volume in schizophrenia. *Psychiatry Res.* 2015; **233**: 175-179.
- 22 Nerhus M, Berg AO, Dahl SR, Holvik K, Gardsjord ES, Weibell MA *et al.* Vitamin D status in psychotic disorder patients and healthy controls--The influence of ethnic background. *Psychiatry Res.* 2015; **230**: 616-621.
- 23 Zhu DM, Liu Y, Zhang AG, Chu ZX, Wu Q, Li H *et al.* High levels of vitamin D in relation to reduced risk of schizophrenia with elevated C-reactive protein. *Psychiatry Res.* 2015; **228**: 565-570.
- 24 Yuksel RN, Altunsoy N, Tikir B, Cingi Kuluk M, Unal K, Goka S *et al.* Correlation between total vitamin D levels and psychotic psychopathology in patients with schizophrenia: therapeutic implications for add-on vitamin D augmentation. *Ther Adv Psychopharmacol* 2014; **4**: 268-275.

- 25 Clelland JD, Read LL, Drouet V, Kaon A, Kelly A, Duff KE *et al.* Vitamin D insufficiency and schizophrenia risk: evaluation of hyperprolinemia as a mediator of association. *Schizophr. Res.* 2014; **156**: 15-22.
- 26 Cieslak K, Feingold J, Antonius D, Walsh-Messinger J, Dracxler R, Rosedale M *et al.* Low vitamin D levels predict clinical features of schizophrenia. *Schizophr. Res.* 2014; **159**: 543-545.
- 27 Itzhaky D, Amital D, Gorden K, Bogomolni A, Arnson Y & Amital H. Low serum vitamin D concentrations in patients with schizophrenia. *Isr. Med. Assoc. J.* 2012; **14**: 88-92.
- 28 McCue RE, Charles RA, Orendain GC, Joseph MD & Abanish JO. Vitamin d deficiency among psychiatric inpatients. *Prim. Care Companion CNS Disord.* 2012 10.4088/PCC.11m01230.
- 29 Abdullah AK, Khan S, Mustafa SF, Qutubuddin AA & Davis CM. Vitamin d status and cardiometabolic risk factors in long-term psychiatric inpatients. *Prim. Care Companion CNS Disord.* 2012; **14**: PCC.11m01221.
- 30 Menkes DB, Lancaster K, Grant M, Marsh RW, Dean P & du Toit SA. Vitamin D status of psychiatric inpatients in New Zealand's Waikato region. *BMC Psychiatry* 2012; **12**: 68.
- 31 Murie J, Messow CM & Fitzpatrick B. Feasibility of screening for and treating vitamin D deficiency in forensic psychiatric inpatients. *J. Forensic Leg. Med.* 2012; **19**: 457-464.
- 32 Doknic M, Maric NP, Britvic D, Pekic S, Damjanovic A, Miljic D *et al.* Bone remodeling, bone mass and weight gain in patients with stabilized schizophrenia in real-life conditions treated with long-acting injectable risperidone. *Neuroendocrinology* 2011; **94**: 246-254.
- 33 Partti K, Heliovaara M, Impivaara O, Perala J, Saarni SI, Lonnqvist J *et al.* Skeletal status in psychotic disorders: a population-based study. *Psychosom. Med.* 2010; **72**: 933-940.
- 34 Humble MB, Gustafsson S & Bejerot S. Low serum levels of 25-hydroxyvitamin D (25-OHD) among psychiatric out-patients in Sweden: relations with season, age, ethnic origin and psychiatric diagnosis. *J. Steroid Biochem. Mol. Biol.* 2010; **121**: 467-470.
- 35 Norelli L, Coates A & Kovasznay B. A comparison of 25-hydroxyvitamin D serum levels in acute and long-stay psychiatric inpatients: A preliminary investigation. *E Spen Eur. E J. Clin. Nutr. Metab.* 2010: e187-e189.



- 36 Rey-Sanchez P, Lavado-Garcia JM, Canal-Macias ML, Gomez-Zubeldia MA, Roncero-Martin R & Pedrera-Zamorano JD. Ultrasound bone mass in schizophrenic patients on antipsychotic therapy. *Hum Psychopharmacol* 2009; **24**: 49-54.
- 37 Bergemann N, Parzer P, Mundt C & Auler B. High bone turnover but normal bone mineral density in women suffering from schizophrenia. *Psychol. Med.* 2008; **38**: 1195-1201.
- 38 Schneider B, Weber B, Frensch A, Stein J & Fritz J. Vitamin D in schizophrenia, major depression and alcoholism. *J Neural Transm (Vienna)* 2000; **107**: 839-842.
- 39 Higuchi T, Komoda T, Sugishita M, Yamazaki J, Miura M, Sakagishi Y *et al.* Certain neuroleptics reduce bone mineralization in schizophrenic patients. *Neuropsychobiology* 1987; **18**: 185-188.
- 40 Lally J, Ajnakina O, Singh N, Gardner-Sood P, Stubbs B, Stringer D *et al.* Vitamin D and clinical symptoms in First Episode Psychosis (FEP): A prospective cohort study. *Schizophr. Res.* 2019; **204**: 381-388.
- 41 Salavert J, Grados D, Ramiro N, Carrion MI, Fadeuilhe C, Palma F *et al.* Association Between Vitamin D Status and Schizophrenia: A First Psychotic Episode Study. *J. Nerv. Ment. Dis.* 2017; **205**: 409-412.
- 42 Yee JY, See YM, Abdul Rashid NA, Neelamekam S & Lee J. Association between serum levels of bioavailable vitamin D and negative symptoms in first-episode psychosis. *Psychiatry Res.* 2016; **243**: 390-394.
- 43 Graham KA, Keefe RS, Lieberman JA, Calikoglu AS, Lansing KM & Perkins DO. Relationship of low vitamin D status with positive, negative and cognitive symptom domains in people with first-episode schizophrenia. *Early Interv Psychiatry* 2015; **9**: 397-405.
- 44 Crews M, Lally J, Gardner-Sood P, Howes O, Bonaccorso S, Smith S *et al.* Vitamin D deficiency in first episode psychosis: a case-control study. *Schizophr. Res.* 2013; **150**: 533-537.
- 45 Dealberto MJ. Clinical symptoms of psychotic episodes and 25-hydroxy vitamin D serum levels in black first-generation immigrants. *Acta Psychiatr. Scand.* 2013; **128**: 475-487.
- 46 Ghaderi A, Rasouli-Azad M, Vahed N, Banafshe HR, Soleimani A, Omid A *et al.* Clinical and metabolic responses to crocin in patients under methadone maintenance treatment: A randomized clinical trial. *Phytother. Res.* 2019; **33**: 2714-2725.

- 47 Fond G, Godin O, Schurhoff F, Berna F, Bulzacka E, Andrianarisoa M *et al.* Hypovitaminosis D is associated with depression and anxiety in schizophrenia: Results from the national FACE-SZ cohort. *Psychiatry Res.* 2018; **270**: 104-110.
- 48 Krivoy A, Onn R, Vilner Y, Hochman E, Weizman S, Paz A *et al.* Vitamin D supplementation in chronic schizophrenia patients treated with clozapine: A randomized, double-Blind, placebo-controlled clinical trial. *EBioMedicine* 2017; **26**: 138-145.
- 49 Sheikhmoonesi F, Zarghami M, Mamashli S, Yazdani Charati J, Hamzehpour R, Fattahi S *et al.* Effectiveness of vitamin D supplement therapy in chronic stable schizophrenic male patients: A randomized controlled trial. *Iran J Pharm Res* 2016; **15**: 941-950.
- 50 Thakurathi N, Stock S, Oppenheim CE, Borba CP, Vincenzi B, Seidman LJ *et al.* Open-label pilot study on vitamin D(3) supplementation for antipsychotic-associated metabolic anomalies. *Int. Clin. Psychopharmacol.* 2013; **28**: 275-282.
- 51 Tiangga E, Gowda A & Dent J. Vitamin D deficiency in psychiatric in-patients and treatment with daily supplements of calcium and ergocalciferol. *BJPsych Bulletin* 2008; **32**: 390-393.
